# Supplementary material for: Interface energy barrier tailoring the morphological structure evolution from ZnO nano/micro rod arrays to microcrystalline thin films by Mn doping
Source: Royal Society of Chemistry journal article supplement (doi:10.1039/c5ra06235g), 2015-01-01
Supplement: c5ra06235g1.pdf [file c5ra06235g1.pdf]

**Interface energy barrier tailoring the morphological structure evolution from ZnO  
nano/micro rod arrays to microcrystalline thin films by Mn doping**

**P. Soundarrajan and K. Sethuraman\***

*School of Physics, Madurai Kamaraj University, Madurai 625021, Tamil Nadu, India*

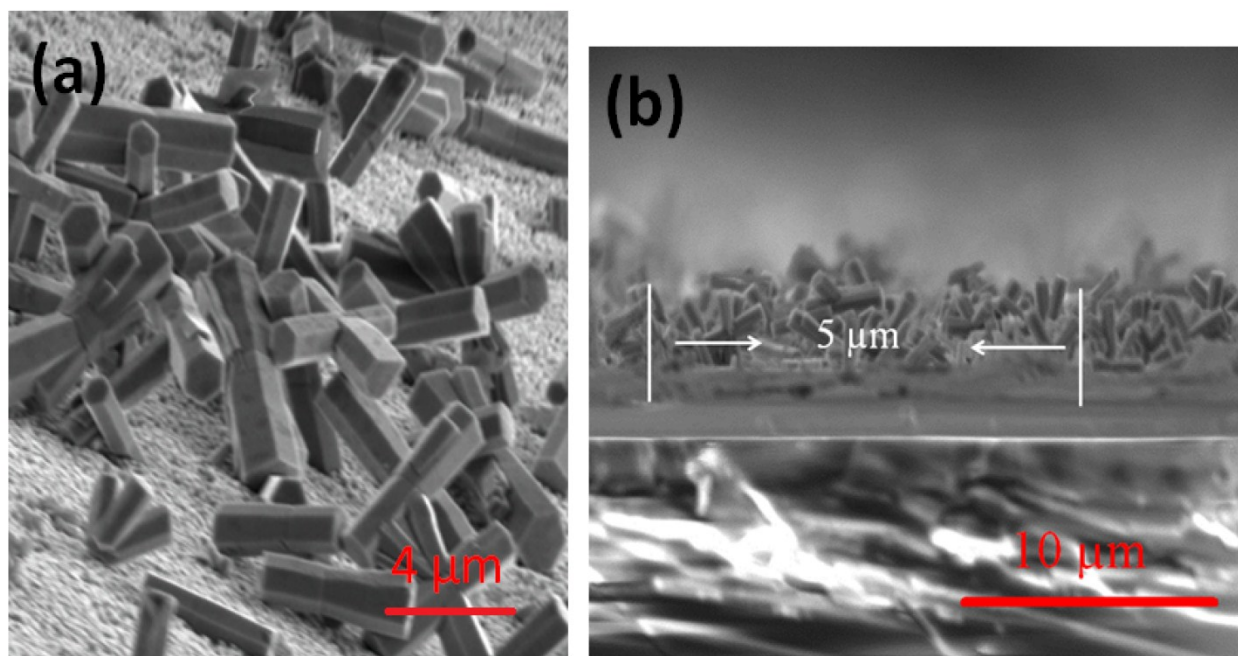

Fig. S1. Tilt (a) and cross-section (b) FESEM image of pure ZnO N/MRAs thin film. Due to low magnification FESEM image of ZnO N/MRAs, the NRs do not clearly seen in cross-section view.

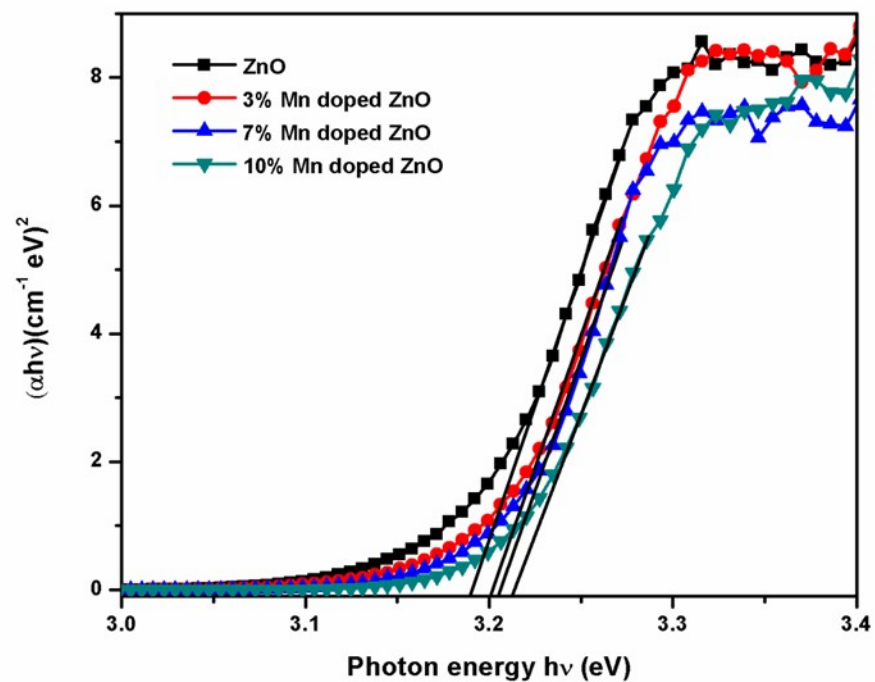

Fig. S3 Band gap energy of pure and Mn doped ZnO N/MRAs thin films.

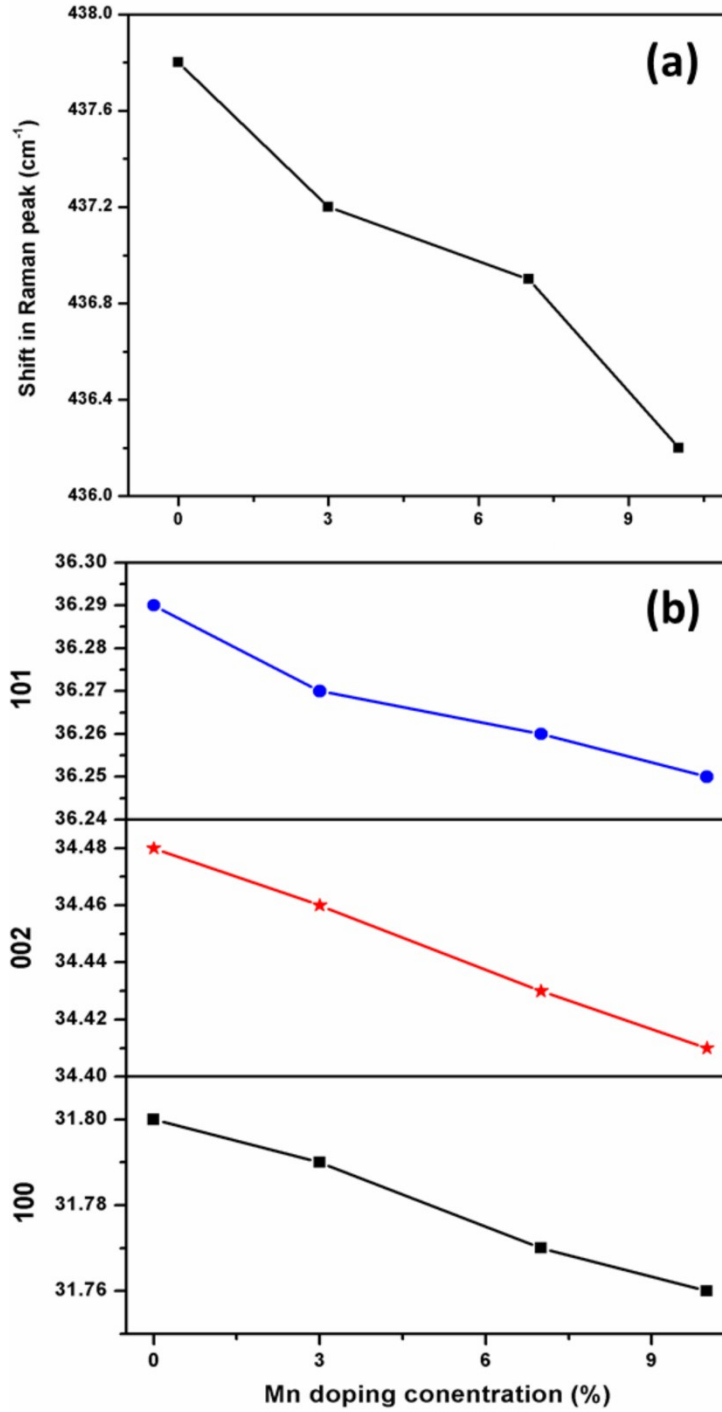

Fig. S3 Raman E<sub>2</sub> high mode shift (a) and dominant XRD peaks shift (b) of pure and Mn doped ZnO N/MRAs films.
